# Supplementary material for: Seroprevalence of anti-SARS-CoV-2 IgG Antibodies in the Staff of a Public School System in the Midwestern United States
Source: PubMed Central journal article supplement (PMC7605578; doi:10.1101/2020.10.23.20218651), 2020-10-27
Supplement: NIHPP2020.10.23.20218651-supplement-1.pdf [file NIHPP2020.10.23.20218651-supplement-1.pdf]

## Supplementary Materials

Data Collection for Seroprevalence Study of COVID 19 in Lake Central Staff  
**This is a student-led study with the purpose of determining the number of Lake Central staff members who have been exposed to COVID 19. If you do not wish to participate in this study, your action on this form is not necessary.**

Print: \_\_\_\_\_

1. Date of Birth (MM/DD/YYYY): \_\_ / \_\_ / \_\_\_\_\_

2. Height (ft): \_\_\_\_\_

3. Weight (lb): \_\_\_\_\_

4. Gender: Male  Female  Other  Prefer not to answer

5.

a. Have you shown any of the following symptoms (check all that apply):

- |                                                |                                                                         |
|------------------------------------------------|-------------------------------------------------------------------------|
| • Headache <input type="checkbox"/>            | • Fatigue <input type="checkbox"/>                                      |
| • Cough <input type="checkbox"/>               | • Shortness of breath/<br>difficulty breathing <input type="checkbox"/> |
| • Congestion <input type="checkbox"/>          | • Muscle/body aches <input type="checkbox"/>                            |
| • Nausea <input type="checkbox"/>              | • Diarrhea <input type="checkbox"/>                                     |
| • Loss of taste/smell <input type="checkbox"/> | • Sore throat <input type="checkbox"/>                                  |
| • Fever or Chills <input type="checkbox"/>     |                                                                         |

b. If yes, when did you last experience those symptoms (MM/DD): \_\_ / \_\_

6.

a. Have you been in contact with anyone who has been diagnosed with COVID-19:

Yes  No

b. If yes, when (MM/DD): \_\_ / \_\_

7.

a. Have you travelled outside the state in the past two weeks: Yes  No

b. If yes, to where (City, State): \_\_\_\_\_

8.

a. Have you tested positive for COVID-19: Yes  No

b. If yes, when did you test positive (MM/DD): \_\_/\_\_/\_\_

9. Do you wear a mask while out in public: Yes  No

10. If you are not a Lake Central Staff Member

a. What is your relation to the staff member: \_\_\_\_\_

b. What is the name of the staff member: \_\_\_\_\_

**If you are not employed by Lake Central School Corporation, please refrain from answering questions 10-13.**

11. Role at LC (Check one):

- |                                                         |                                                                                                     |
|---------------------------------------------------------|-----------------------------------------------------------------------------------------------------|
| • Janitorial/Maintenance Staff <input type="checkbox"/> | • Art, Music, or P.E. Department <input type="checkbox"/>                                           |
| • Technology Department <input type="checkbox"/>        | • English Department <input type="checkbox"/>                                                       |
| • Lunch Staff <input type="checkbox"/>                  | • Math Department <input type="checkbox"/>                                                          |
| • Bus Driver/ Bus Aide <input type="checkbox"/>         | • Science Department <input type="checkbox"/>                                                       |
| • Guidance/Administration <input type="checkbox"/>      | • Social Studies Department <input type="checkbox"/>                                                |
| • West Lake Department <input type="checkbox"/>         | • World Language, Business, Consumer Science, or Communications Department <input type="checkbox"/> |
| • General Elementary Teacher <input type="checkbox"/>   |                                                                                                     |

12. What school do you work at (Check all that apply):

- |                                                     |                                                       |
|-----------------------------------------------------|-------------------------------------------------------|
| • Lake Central High School <input type="checkbox"/> | • Peifer Elementary School <input type="checkbox"/>   |
| • Clark Middle School <input type="checkbox"/>      | • Kolling Elementary School <input type="checkbox"/>  |
| • Kahler Middle School <input type="checkbox"/>     | • Bibich Elementary School <input type="checkbox"/>   |
| • Grimmer Middle School <input type="checkbox"/>    | • Protsman Elementary School <input type="checkbox"/> |
| • Watson Elementary School <input type="checkbox"/> | • Transportation Center <input type="checkbox"/>      |
| • Homan Elementary School <input type="checkbox"/>  |                                                       |

13. Do you coach a school sport: Yes  No

14. Do you supervise a school club: Yes  No

**Supplementary Figure 1:** Construction of a DAG to Test for a Causal Association between Mask Wearing and Seropositivity

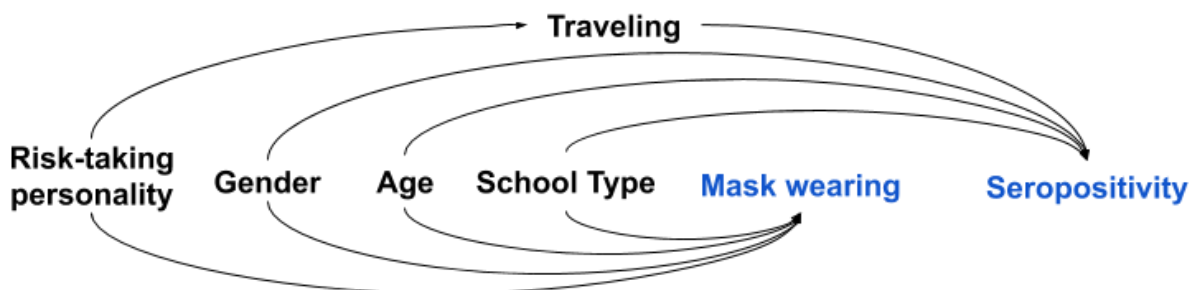

\*Risk-taking personality could affect seroprevalence in other ways such as not social distancing, but those data weren't collected nor adjusted for in this round of testing.

**Supplementary Table 1:** Logistic Regression Results for the relationship between mask wearing history and seropositivity, adjusting for potential confounders

| Effect                       | Relative Risk Ratio | 95% CI    |           | <i>p</i> |
|------------------------------|---------------------|-----------|-----------|----------|
|                              |                     | <i>LL</i> | <i>UL</i> |          |
| Constant                     | 0.028               | 0.0015    | 0.51      | 0.016    |
| Working in the Summer        | 0.16                | 0.022     | 1.3       | 0.082    |
| Working in a Middle School   | 3.4                 | 0.69      | 17        | 0.13     |
| Female Gender                | 0.56                | 0.19      | 1.6       | 0.29     |
| Travel History               | 0.66                | 0.22      | 2.0       | 0.47     |
| Working in a High School     | 1.7                 | 0.31      | 9.1       | 0.55     |
| Age                          | 1.0                 | 0.97      | 1.0       | 0.67     |
| Working in Elementary School | 1.4                 | 0.26      | 7.5       | 0.69     |
| Mask History                 | 0.83                | 0.18      | 3.8       | 0.82     |

**Supplementary Table 2: Stepwise Backwards Feature Elimination Regression Results**

| Effect              | Odds Ratio | 95% CI    |           | <i>p</i> |
|---------------------|------------|-----------|-----------|----------|
|                     |            | <i>LL</i> | <i>UL</i> |          |
| Intercept           | 0.028      | 0.0063    | 0.13      | <0.001   |
| Contact History     | 5.6        | 2.1       | 15.1      | 0.001    |
| Previous COVID Test | 48.2       | 3.9       | 597       | 0.003    |
| Mask History        | 0.61       | 0.13      | 2.8       | 0.53     |
| Travel History      | 0.66       | 0.21      | 2.1       | 0.48     |
| Symptom History     | 1.6        | 0.61      | 4.4       | 0.33     |
